# Supplementary material for: AURKB/CDC37 complex promotes clear cell renal cell carcinoma progression via phosphorylating MYC and constituting an AURKB/E2F1-positive feedforward loop
Source: PubMed Central journal article supplement (PMC11189524; doi:10.1038/s41419-024-06827-y), 2024-06-18

## Supplementary Figures

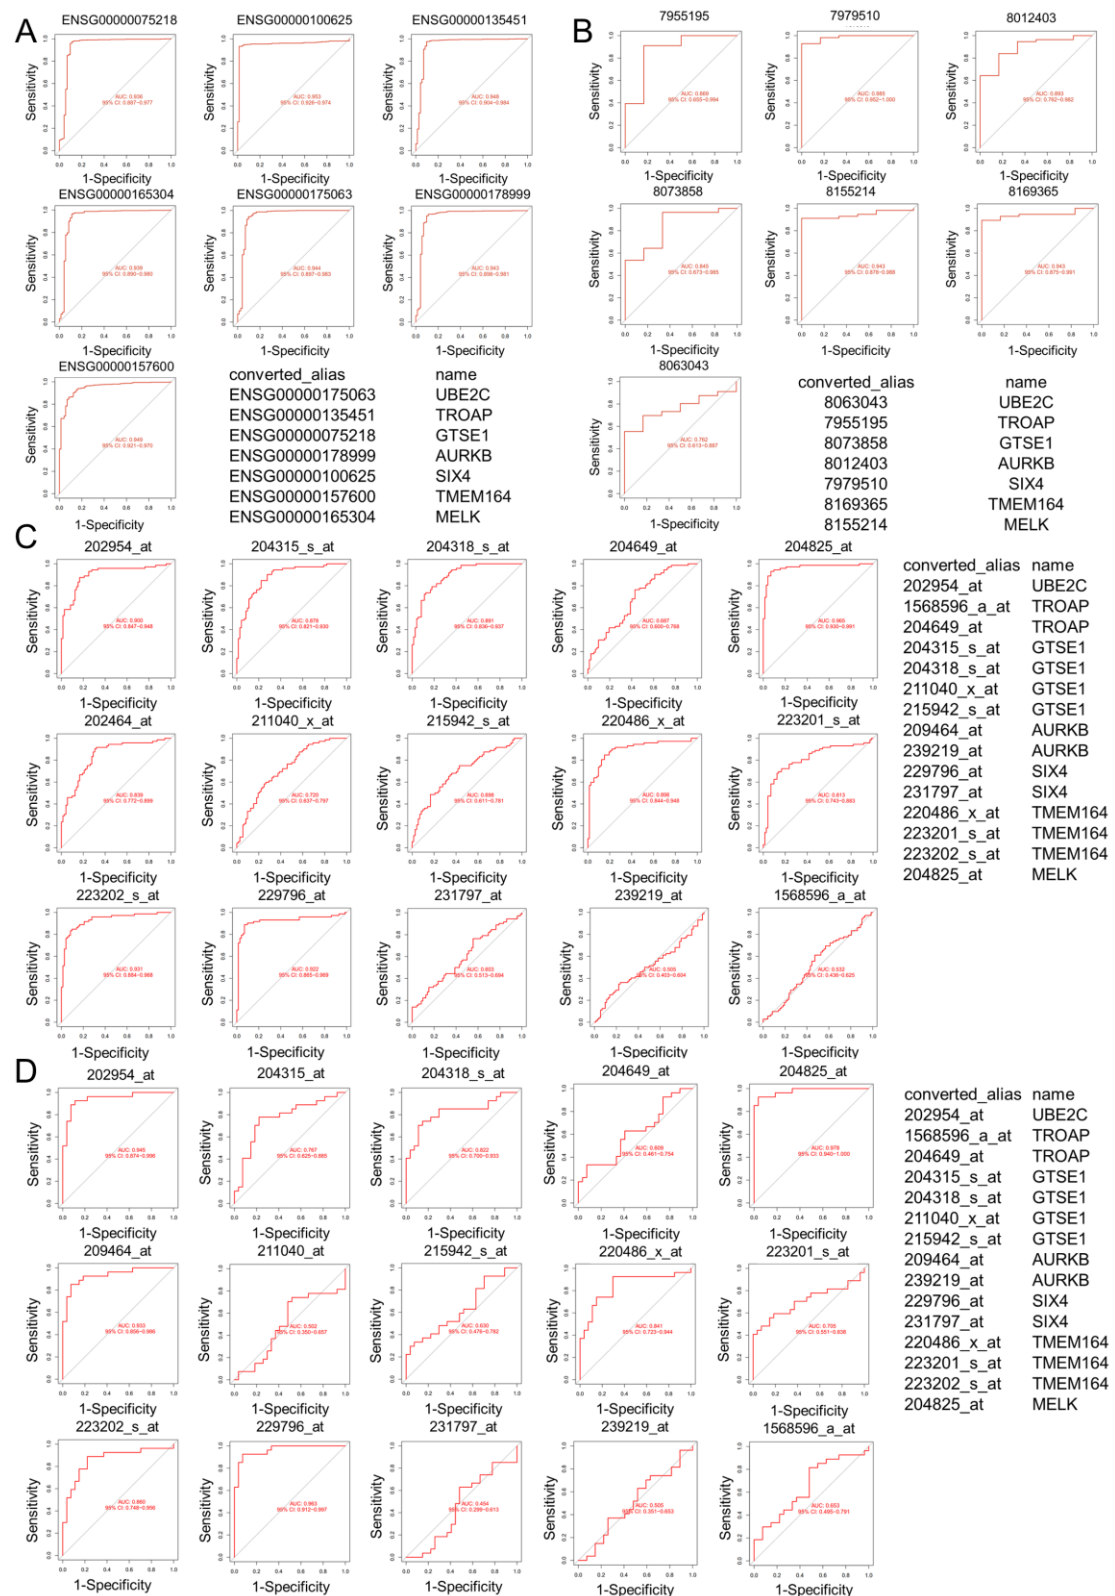

**Figure S1.** Machine learning to analyze the sensitivity of 7 key genes to ccRCC. The data in TCGA database (A) and three GEO databases, gse53000 (B), gse53757 (C) and gse66272 (D) were used for machine learning to analyze the sensitivity of 7 key genes to ccRCC.

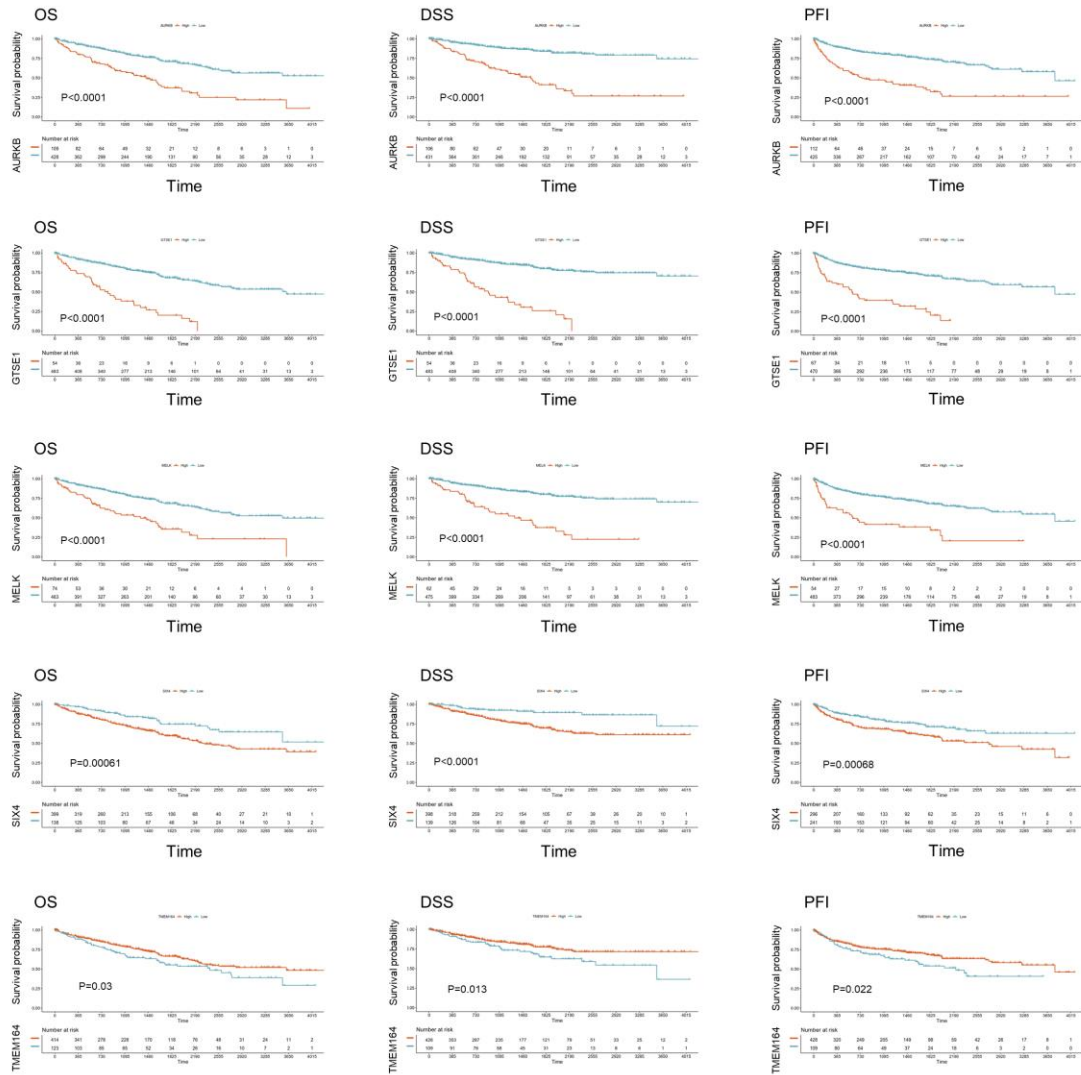

**B**

|       | OS     |                    | DSS    |                    | PFI    |                    |
|-------|--------|--------------------|--------|--------------------|--------|--------------------|
|       | pvalue | Hazard ratio       | pvalue | Hazard ratio       | pvalue | Hazard ratio       |
| GTSE1 | <0.001 | 1.077(1.057-1.096) | <0.001 | 1.090(1.070-1.111) | <0.001 | 1.068(1.049-1.087) |
| AURKB | <0.001 | 1.038(1.028-1.048) | <0.001 | 1.043(1.033-1.054) | <0.001 | 1.035(1.025-1.044) |
| SIX4  | 0.003  | 1.075(1.025-1.127) | 0.002  | 1.086(1.029-1.145) | <0.001 | 1.037(1.026-1.049) |
| MELK  | <0.001 | 1.048(1.035-1.060) | <0.001 | 1.063(1.047-1.078) | <0.001 | 1.037(1.026-1.049) |

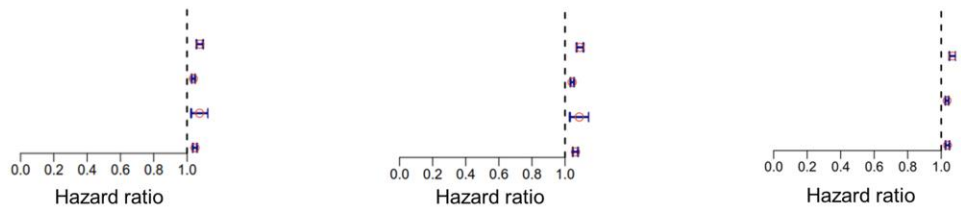

**Figure S2.** Correlation analysis of key genes with ccRCC survival. (A) TCGA data were used to calculate the influence of key gene expression on prognostic data of ccRCC, including OS, DSS and PFI. (B) Cox regression map was used to investigate the influence of key genes on prognostic types of ccRCC.

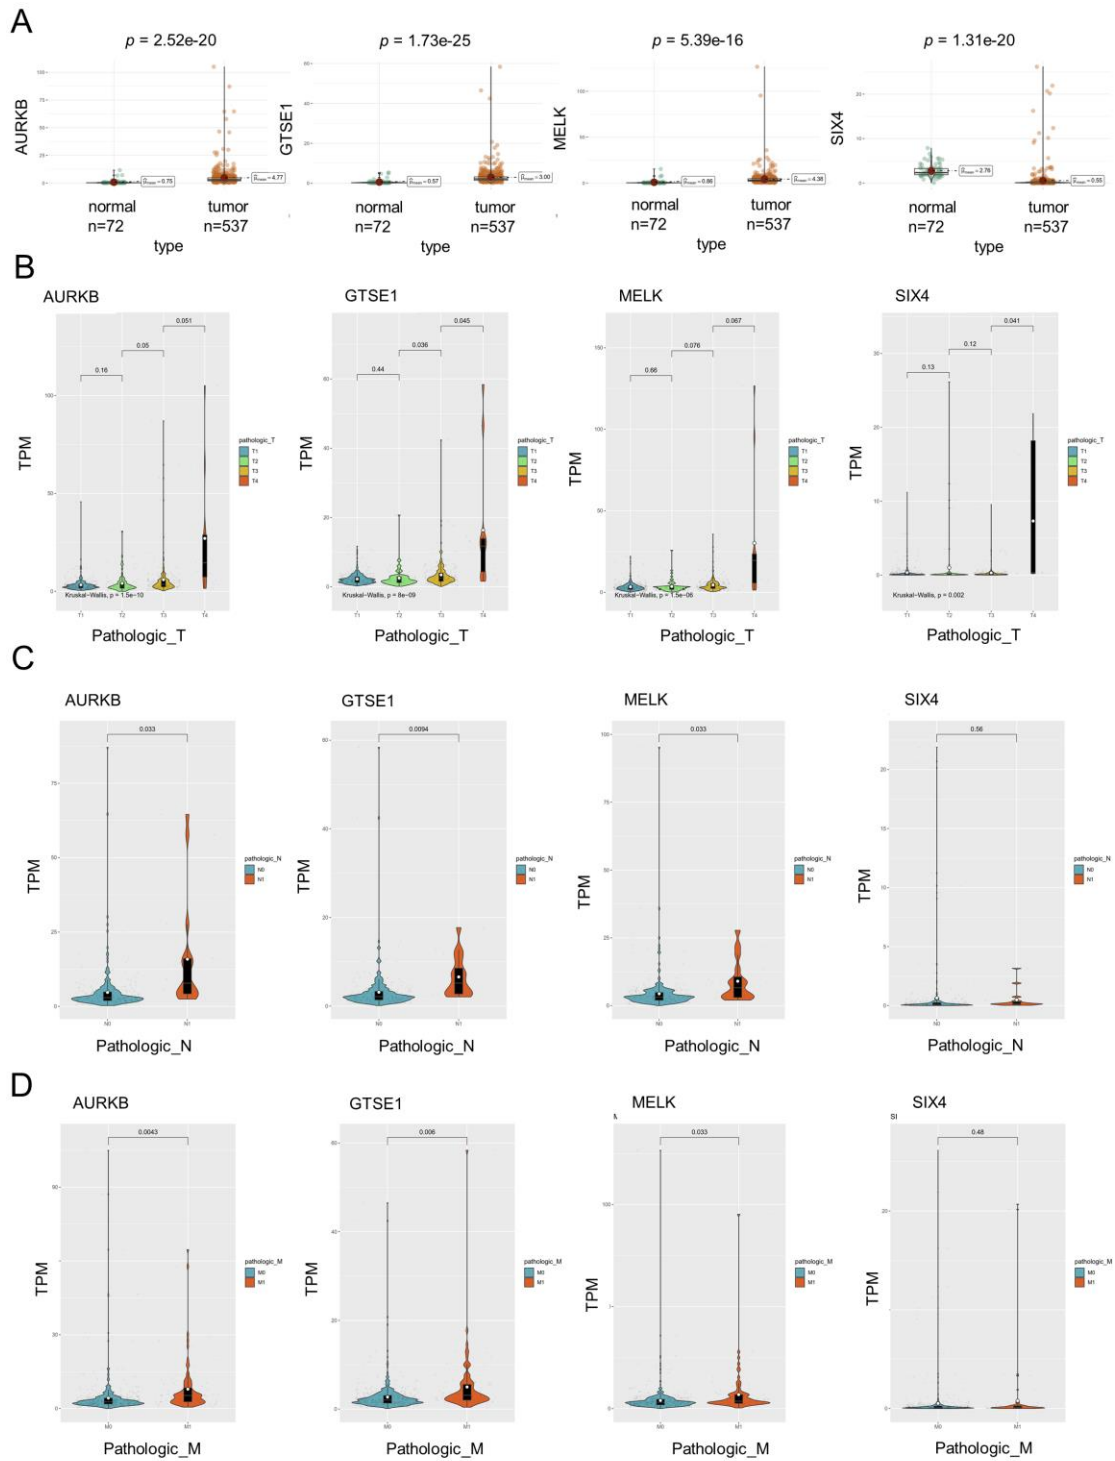

**Figure S3.** Expression and clinical correlation analysis of key genes. (A) Expression of key genes in ccRCC. The correlation between key genes expression and clinical stage in the TCGA databases. The expression of key genes in different topography (B), lymph node metastasis (C), distant

metastasis (D).

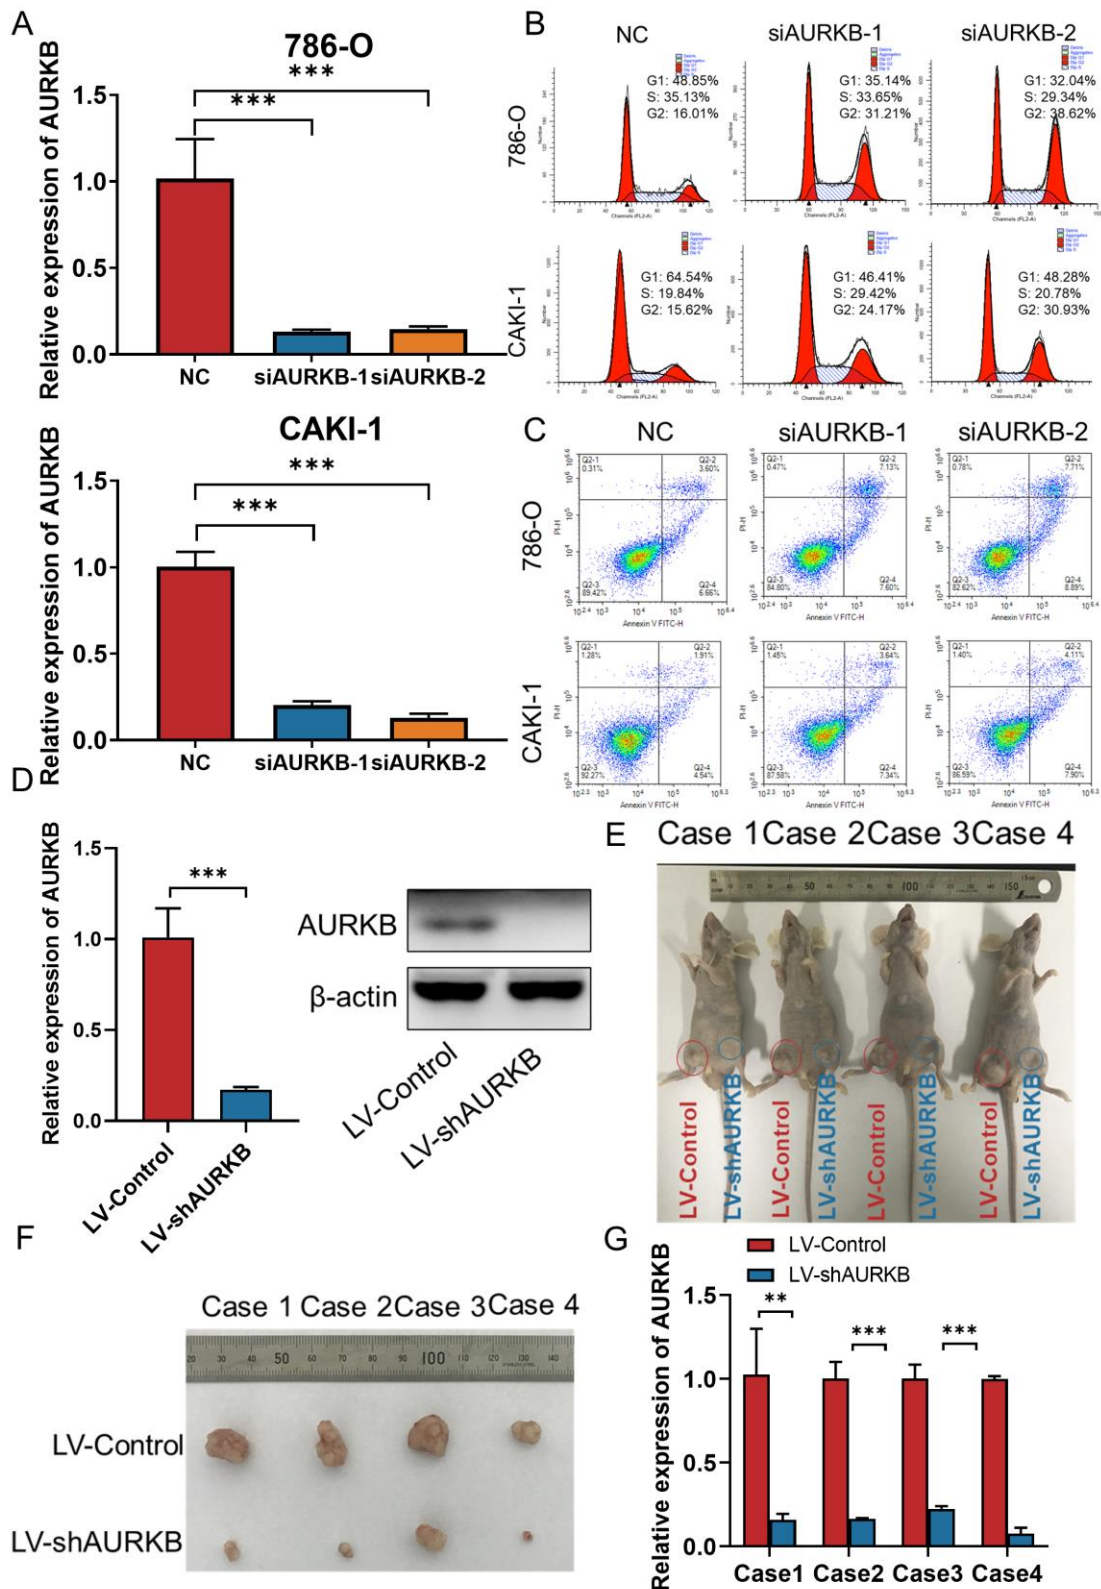

**Figure S4.** AURKB is up-regulated in ccRCC and promotes the proliferation and migration of ccRCC cells in vitro in vivo. (A) mRNA expression levels of AURKB in 786-O and CAKI-1 cells were detected by qRT-PCR to confirm the knockdown efficiency of both siRNAs. (B) Flow

cytometry was used to detect the effect of AURKB knockdown on cell cycle of 786-O and CAKI-1 cells. (C) Flow cytometry was used to detect the effect of AURKB knockdown on cell apoptosis of 786-O and CAKI-1 cells. (D) qRT-PCR and western blotting were used to detect AURKB mRNA and protein expression in LV-Control and LV-shAURKB cells. (E) Gross morphology of tumors after 28 days of injection of LV-Control and LV-shAURKB cells. (F) Size of xenograft tumors 28 days after injection of LV-Control and LV-shAURKB cells. (G) mRNA levels of AURKB in xenograft tumors were analyzed by qRT-PCR.

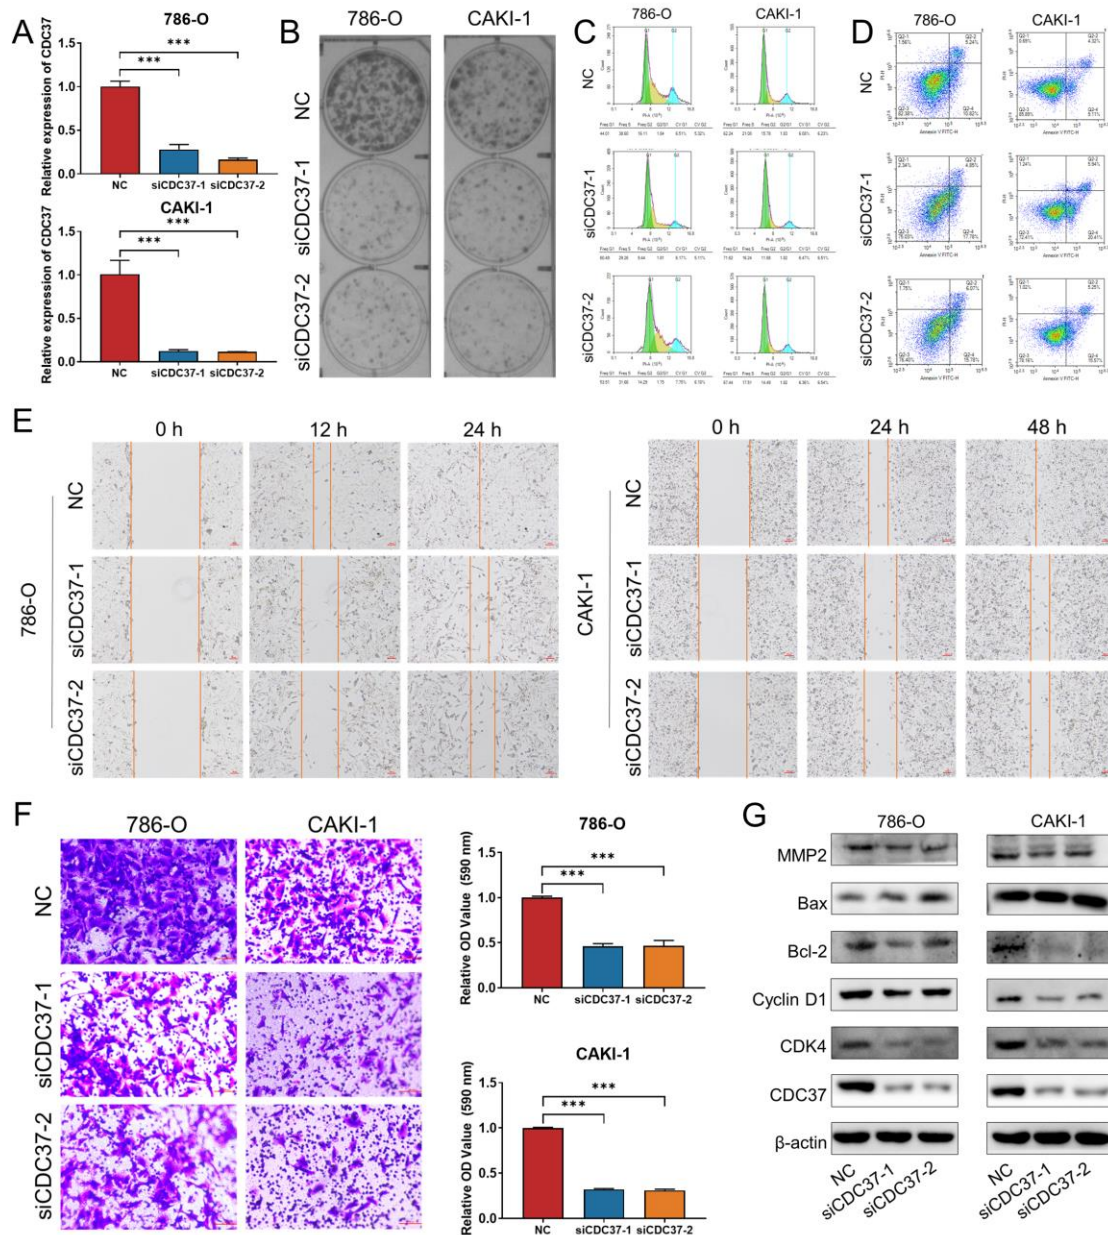

**Figure S5.** CDC37 phenocopy AURKB in ccRCC. (A) mRNA expression levels of CDC37 in 786-O and CAKI-1 cells were detected by qRT-PCR to confirm the knockdown efficiency of both

siRNAs. (B) Colony formation assay was used to detect the effect of CDC37 knockdown on the colony formation ability of 786-O and CAKI-1 cells. (C) The effect of CDC37 knockdown on cell cycle of 786-O and CAKI-1 cells was detected by flow cytometry. (D) Flow cytometry was used to detect the effect of CDC37 knockdown on cell apoptosis of 786-O and CAKI-1 cells. (E) Wound healing assay was used to detect the effect of CDC37 knockdown on the migration of 786-O and CAKI-1 cells. (F) Transwell assay was used to detect the effect of CDC37 knockdown on the migration of 786-O and CAKI-1 cells, and the OD value of the traversed cells was used for statistical mapping. (G) Western blotting was used to detect the effect of CDC37 knockdown on the expression of cell cycle, apoptosis and migration related molecules at protein level in 786-O and CAKI-1. \* $p < 0.05$ , \*\* $p < 0.01$ , \*\*\* $p < 0.001$ .

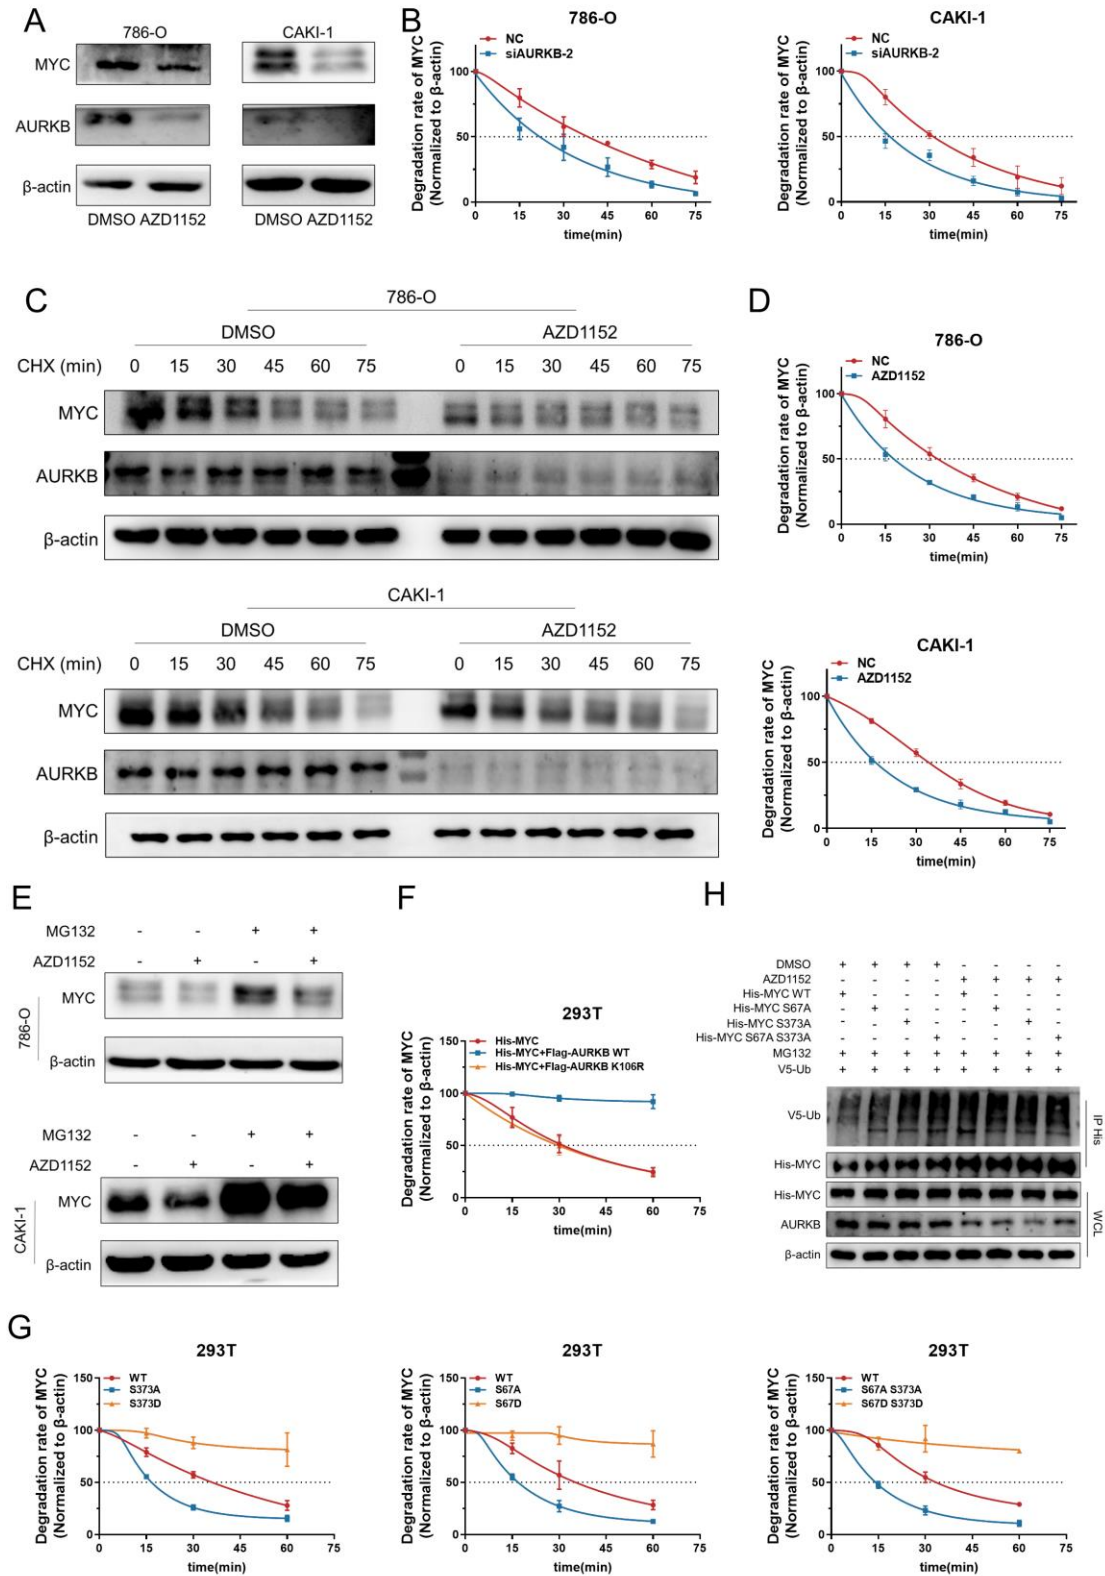

**Figure S6.** AURKB-mediated MYC phosphorylation contributes to MYC stability. (A) Western blotting was used to detect MYC protein in 786-O and CAKI-1 cells treated with AZD1152 (786-O: 500 nM; CAKI-1: 300 nM). (B) MYC proteins were quantified and plotted. (C) Time course analysis of MYC protein level in 786-O and CAKI-1 cells treated with AZD1152 (786-O: 500 nM;

CAKI-1: 300 nM). (D) MYC proteins were quantified and plotted. (E) 786-O and AKI-1 cells treated with AZD1152 (786-O: 500 nM; CAKI-1: 300 nM) were added to MG132 (10  $\mu$ M) for 6 h before harvest. AURKB and MYC were analyzed by immunoblot, with  $\beta$ -actin as a control. (F) MYC proteins were quantified and plotted. (G) MYC proteins were quantified and plotted. (H) HEK-293T cells were co-transfected with V5-UB, AZD1152 (0 or 200nM) and His-MYC (WT, S67A, S373A, or S67A S373A), and treated with MG132 (10  $\mu$ M) for 6 h before harvest. Cell lysates were subjected to Co-IP, ubiquitination, and immunoblot assays.

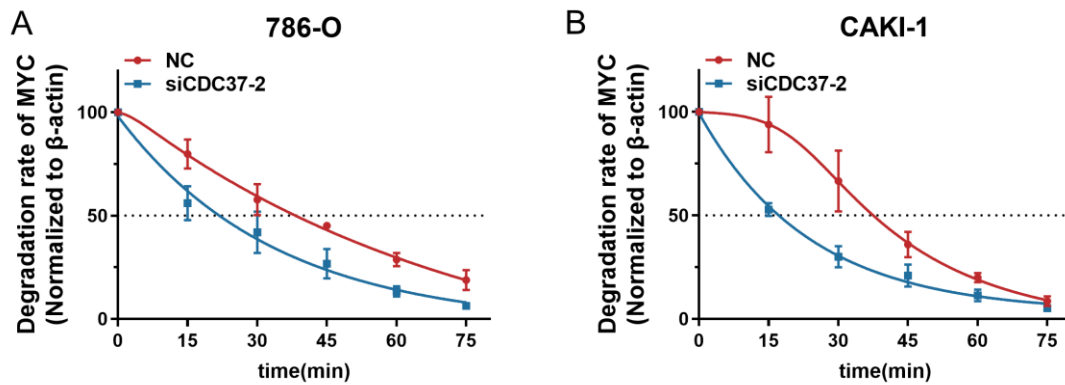

**Figure S7.** MYC proteins were quantified and plotted. (A) MYC proteins were quantified and plotted in 786-O cells. (B) MYC proteins were quantified and plotted in CAKI-1 cells.



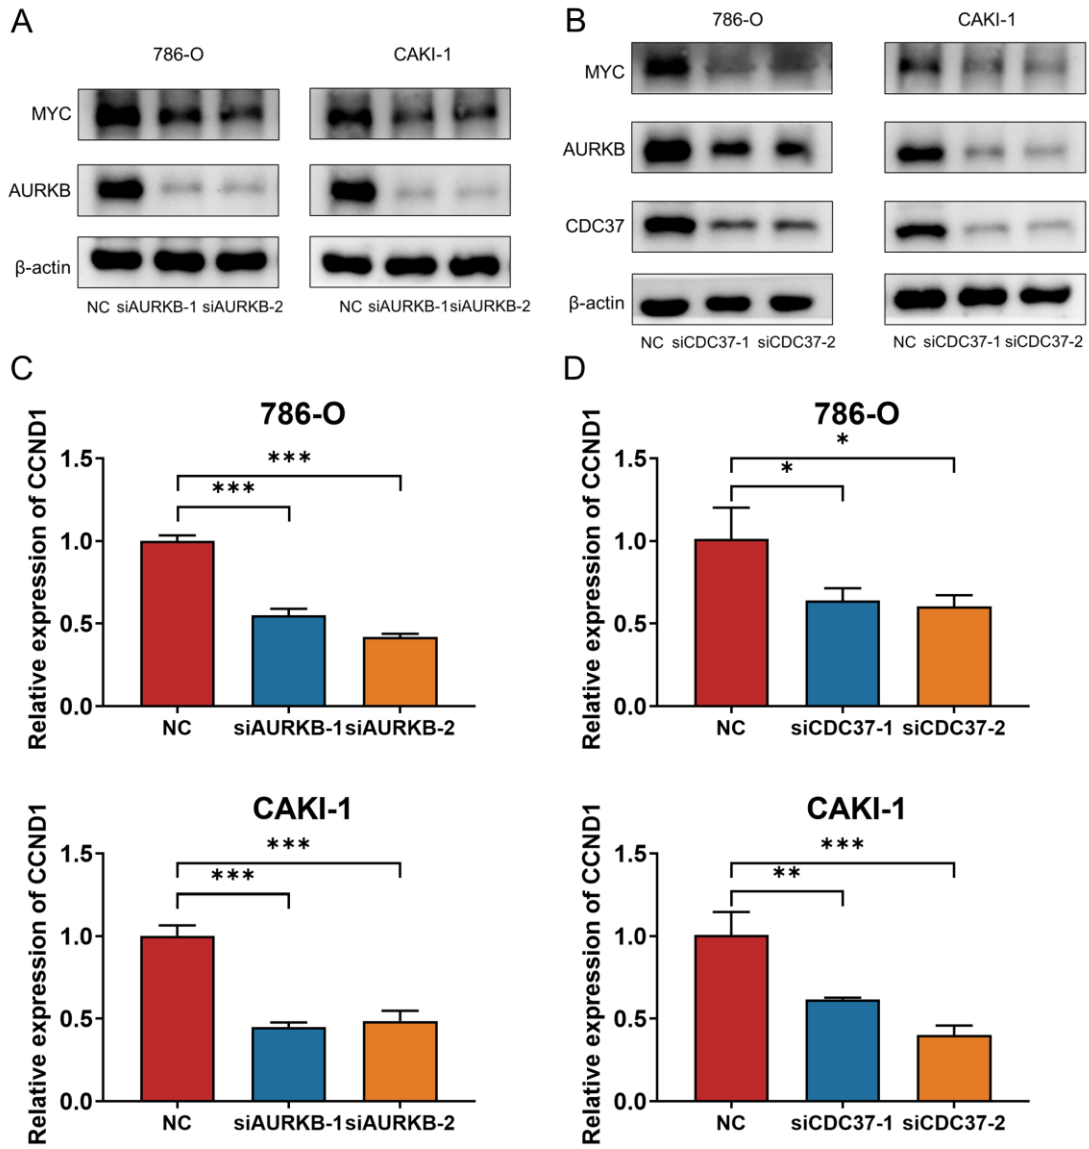

**Figure S8.** Regulation of CDC37, AURKB, MYC and CCND1 expression in synchronized cells. (A) Western blotting was used to detect the expression changes of MYC after AURKB knockdown in synchronized ccRCC cells. (B) Western blotting was used to detect the expression changes of AURKB and MYC after CDC37 knockdown in synchronized ccRCC cells. (C) CCND1 mRNA levels in synchronized 786-O and CAKI-1 cells with AURKB knockdown were detected by qRT-PCR. (D) CCND1 mRNA levels in synchronized 786-O and CAKI-1 cells with CDC37 knockdown were detected by qRT-PCR. \* $p < 0.05$ , \*\* $p < 0.01$ , \*\*\* $p < 0.001$ .

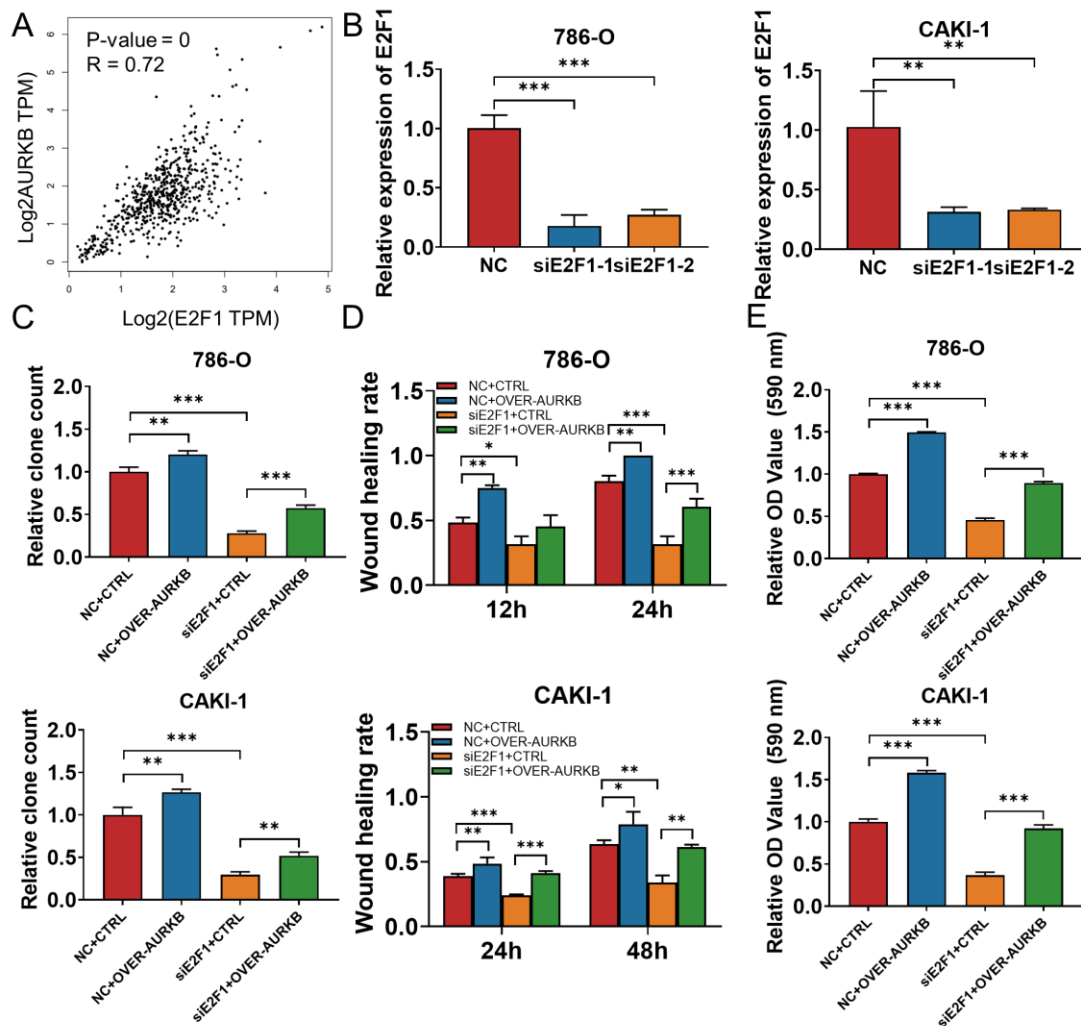

**Figure S9.** E2F1 activates AURKB expression directly. (A) The relationship between E2F1 and AURKB was assayed by Pearson's  $r$ . (B) The mRNA expression levels of E2F1 in 786-O and CAKI-1 cells were detected by qRT-PCR to confirm the knockdown efficiency of both siRNAs. (C) Quantification of colony formation assay in 786-O and CAKI-1 cells after co-transfection with NC+Ctrl, NC+Over-AURKB, siE2F1-2+Ctrl, siE2F1-2+Over-AURKB. (D) Quantification of wound-healing assay in 786-O and CAKI-1 cells after co-transfection with NC+Ctrl, NC+Over-AURKB, siE2F1-2+Ctrl, siE2F1-2+Over-AURKB. (E) Quantification of Transwell assay in 786-O and CAKI-1 cells after co-transfection with NC+Ctrl, NC+Over-AURKB, siE2F1-2+Ctrl, siE2F1-2+Over-AURKB.  $*p < 0.05$ ,  $**p < 0.01$ ,  $***p < 0.001$ .

## **Table S1. DATA and R language description**

### **1. TCGA data download website and citation**

**website:** TCGA data download from UCSC XENA (<https://xena.ucsc.edu>)

**Cite:**

The UCSC Xena platform for public and private cancer genomics data visualization and interpretation

Mary Goldman, Brian Craft, Mim Hastie, Kristupas Repečka, Fran McDade, Akhil Kamath, Ayan Banerjee, Yunhai Luo, Dave Rogers, View ORCID ProfileAngela N. Brooks, Jingchun Zhu, David Haussler doi: <https://doi.org/10.1101/326470>

### **2. The dataset of clinical stage:**

**dataset:** phenotype - Phenotypes

**hub:** <https://tcga.xenahubs.net>

**dataset ID:** TCGA.KIRC.sampleMap/KIRC\_clinicalMatrix

download: [https://tcga-xena-hub.s3.us-east-](https://tcga-xena-hub.s3.us-east-1.amazonaws.com/download/TCGA.KIRC.sampleMap/KIRC_clinicalMatrix)

[1.amazonaws.com/download/TCGA.KIRC.sampleMap/KIRC\\_clinicalMatrix](https://tcga-xena-hub.s3.us-east-1.amazonaws.com/download/TCGA.KIRC.sampleMap/KIRC_clinicalMatrix); Full metadata

**samples:** 945

**version:** 2019-12-06

**type of data:** phenotype

**raw data:** <https://tcga->

[data.nci.nih.gov/tcgafiles/ftp\\_auth/distro\\_ftpusers/anonymous/tumor/lihc/bcr/](https://tcga-ftpusers.anonymous.tumor.lihc/bcr/)

#### **Notes of different clinical stage in manuscript**

neoplasm\_histologic\_grade: G1 G2 G3 G4

pathologic\_stage: Stage I Stage II Stage III Stage IV

pathologic\_T: T1 T2 T3 T4

pathologic\_M: M0 M1

pathologic\_N: N0 N1

### **3. The survival dataset:**

**dataset:** phenotype - Curated survival data

**hub:** <https://tcga.xenahubs.net>

Curated survival data from the Pan-cancer Atlas paper titled "An Integrated TCGA Pan-Cancer Clinical Data Resource (TCGA-CDR) to drive high quality survival outcome analytics". The paper highlights four types of carefully curated survival endpoints, and recommends the use of the endpoints of OS(overall survival), PFI( progression-free interval), DFI(disease-free interval), and DSS(disease-specific survival) for each TCGA cancer type.

**dataset ID:** survival/KIRC\_survival.txt

download: [https://tcga.xenahubs.net/download/survival/KIRC\\_survival.txt.gz](https://tcga.xenahubs.net/download/survival/KIRC_survival.txt.gz); Full metadata

**samples:** 944

**version:** 2018-09-13

**type of data:** phenotype

**raw data:** [http://www.cell.com/cell/fulltext/S0092-8674\(18\)30229-0](http://www.cell.com/cell/fulltext/S0092-8674(18)30229-0)

### **4. The version and citation of limma**

**Version:** 3.54.1

**Cite:**

Ritchie, M.E., Phipson, B., Wu, D., Hu, Y., Law, C.W., Shi, W., and Smyth, G.K. (2015). limma powers differential expression analyses for RNA-sequencing and microarray studies. *Nucleic Acids Research* 43(7), e47.

**5. The version and citation of DESeq2**

**Version:** 1.38.3

**Cite:**

Love, M.I., Huber, W., Anders, S. Moderated estimation of fold change and dispersion for RNA-seq data with DESeq2 *Genome Biology* 15(12):550 (2014).

**6. The version and citation of edgeR**

**Version:** 3.40.2

**Cite:**

Robinson MD, McCarthy DJ and Smyth GK (2010). edgeR: a Bioconductor package for differential expression analysis of digital gene expression data. *Bioinformatics* 26,139-140.

McCarthy DJ, Chen Y and Smyth GK (2012). Differential expression analysis of multifactor RNA-Seq experiments with respect to biological variation. *Nucleic Acids Research* 40,4288-4297.

Chen Y, Lun ATL, Smyth GK (2016). From reads to genes to pathways: differential expression analysis of RNA-Seq experiments using Rsubread and the edgeR quasi-likelihood pipeline. *F1000Research* 5, 1438.

**7. The version and citation of tidyverse**

**Version:** 1.3.2

**Cite:**

Wickham H, Averick M, Bryan J, Chang W, McGowan LD, François R, Golemund G, Hayes A, Henry L, Hester J, Kuhn M, Pedersen TL, Miller E, Bache SM, Müller K, Ooms J, Robinson D, Seidel DP, Spinu V, Takahashi K, Vaughan D, Wilke C, Woo K, Yutani H (2019). “Welcome to the tidyverse.” *Journal of Open Source Software*, 4(43), 1686. doi:10.21105/joss.01686 <<https://doi.org/10.21105/joss.01686>>.

**8. The version and citation of ggplot2**

**Version:** 3.4.1

**Cite:**

H. Wickham. ggplot2: Elegant Graphics for Data Analysis. Springer-Verlag New York, 2016.

**9. The version and citation of data.table**

**Version:** 1.14.8

**Cite:**

Dowle M, Srinivasan A (2023). `data.table`: Extension of `'data.frame'`. R package version 1.14.8, <<https://CRAN.R-project.org/package=data.table>>.

**10. The version and citation of WGCNA**

**Version:** 1.72.1

**Cite:**

Langfelder P and Horvath S, WGCNA: an R package for weighted correlation network analysis. *BMC Bioinformatics* 2008, 9:559 doi:10.1186/1471-2105-9-559

Peter Langfelder, Steve Horvath (2012). Fast R Functions for Robust Correlations and Hierarchical

Clustering. Journal of Statistical Software, 46(11), 1-17. URL <http://www.jstatsoft.org/v46/i11/>.

#### **11. The version and citation of e1071**

**Version:** 1.7.13

**Cite:**

Meyer D, Dimitriadou E, Hornik K, Weingessel A, Leisch F (2023). `_e1071`: Misc Functions of the Department of Statistics, Probability Theory Group (Formerly: E1071), TU Wien. R package version 1.7-13, <<https://CRAN.R-project.org/package=e1071>>.

#### **12. The version and citation of kernlab**

**Version:** 0.9.32

**Cite:**

Karatzoglou A, Smola A, Hornik K (2023). `_kernlab`: Kernel-Based Machine Learning Lab. R package version 0.9-32, <<https://CRAN.R-project.org/package=kernlab>>.

Karatzoglou A, Smola A, Hornik K, Zeileis A (2004). "kernlab - An S4 Package for Kernel Methods in R." *\_Journal of Statistical Software\_*, \*11\*(9), 1-20. doi:10.18637/jss.v011.i09 <<https://doi.org/10.18637/jss.v011.i09>>.

#### **13. The version and citation of caret**

**Version:** 6.0.93

**Cite:**

Kuhn M (2022). `_caret`: Classification and Regression Training. R package version 6.0-93, <<https://CRAN.R-project.org/package=caret>>.

#### **14. The version and citation of gbm**

**Version:** 2.1.8.1

**Cite:**

Greenwell B, Boehmke B, Cunningham J, Developers G (2022). `_gbm`: Generalized Boosted Regression Models. R package version 2.1.8.1, <<https://CRAN.R-project.org/package=gbm>>.

#### **15. The version and citation of randomForest**

**Version:** 4.7.1.1

**Cite:**

A. Liaw and M. Wiener (2002). Classification and Regression by randomForest. *R News* 2(3), 18--22.

#### **16. The version and citation of rms**

**Version:** 6.5.0

**Cite:**

Harrell Jr FE (2023). `_rms`: Regression Modeling Strategies. R package version 6.5-0, <<https://CRAN.R-project.org/package=rms>>.

#### **17. The version and citation of regplot**

**Version:** 1.1

**Cite:**

Marshall R (2020). `_regplot`: Enhanced Regression Nomogram Plot. R package version 1.1, <<https://CRAN.R-project.org/package=regplot>>.

#### **18. The version and citation of ggstatsplot**

**Version:** 0.11.0

**Cite:**

Patil, I. (2021). Visualizations with statistical details: The 'ggstatsplot' approach. *Journal of Open*

Source Software, 6(61), 3167, doi:10.21105/joss.03167.

**19. The version and citation of glmnet**

**Version:** 4.1.6

**Cite:**

Jerome Friedman, Trevor Hastie, Robert Tibshirani (2010). Regularization Paths for Generalized Linear Models via Coordinate Descent. *Journal of Statistical Software*, 33(1), 1-22. URL <https://www.jstatsoft.org/v33/i01/>.

Noah Simon, Jerome Friedman, Trevor Hastie, Rob Tibshirani (2011). Regularization Paths for Cox's Proportional Hazards Model via Coordinate Descent. *Journal of Statistical Software*, 39(5), 1-13. URL <https://www.jstatsoft.org/v39/i05/>.

**Table S2 siRNAs, primers, antibodies and inhibitors used in this study.**

| <b>Sequences of interference oligonucleotides</b> |                           |
|---------------------------------------------------|---------------------------|
| <b>Name</b>                                       | <b>Sequence</b>           |
| siNC-sense                                        | UUCUCCGAACGUGUCACGU       |
| siNC-antisense                                    | ACGUGACACGUUCGGAGAA       |
| siAURKB-1 sense                                   | CGCGGCACUUCACAAUUGA       |
| siAURKB-1 antisense                               | UCAAUUGUGAAGUGCCGCG       |
| siAURKB-2 sense                                   | UUUAGGUCCACCUUGACGAUGCGGC |
| siAURKB-2 antisense                               | GCCGCAUCGUCAAGGUGGACCUAAA |
| siCDC37-1 sense                                   | CGUGGACACGCUCAGCAAA       |
| siCDC37-1 antisense                               | UUUGCUGAGCGUGUCCACG       |
| siCDC37-2 sense                                   | GUACAUGGAGGGUUUCAAU       |
| siCDC37-2 antisense                               | AUUGAAACCCUCCAUGUAC       |
| siE2F1-1 sense                                    | GCGGAGGCUGGACCUGGAA       |
| siE2F1-1 antisense                                | UCCAGGUCCAGCCUCCGC        |
| siE2F1-2 sense                                    | CAAGGCCCGAUCGAUGUUU       |
| siE2F1-2 antisense                                | AAACAUCGAUCGGGCCUUG       |

| <b>Primer information</b> |                         |
|---------------------------|-------------------------|
| <b>Name</b>               | <b>Sequence</b>         |
| AURKB-F                   | AGGAGAACTCCTACCCCTGG    |
| AURKB-R                   | AGATGGGGTGACAGGCTCTT    |
| CDC37-F                   | AACACAAGACCTTCGTGGAAAA  |
| CDC37-R                   | TAATTGGCTGTCTCCTCGCAC   |
| E2F1-F                    | CATCAGTACCTGGCCGAGAG    |
| E2F1-R                    | TGGTGGTCAGATTCAGTGAGG   |
| CCND1-F                   | CAATGACCCCGCACGATTTC    |
| CCND1-R                   | CATGGAGGGCGGATTGGAA     |
| GAPDH-F                   | GGAGCGAGATCCCTCCAAAAT   |
| GAPDH-R                   | GGCTGTTGTCATACTTCTCATGG |
| ChIP-PCR-AURKB-1-F        | CGTCCCTACCTCCTTCCAGC    |
| ChIP-PCR-AURKB-1-R        | GCGTGGCAGATTCAGTTGTTT   |
| ChIP-PCR-AURKB-2-F        | TCGTCGCCCATGCCTAGTTC    |
| ChIP-PCR-AURKB-2-R        | CCCTTCTCATTCGGCCTCTTC   |
| ChIP-PCR-AURKB-3-F        | GGGTCCAAGGCACTGCTACT    |
| ChIP-PCR-AURKB-3-R        | TCACAGGACATCGAGCCAAT    |

**Antibodies and inhibitors information in this work**

| <b>Antibody</b>                            | <b>Company</b>               | <b>Catalog No</b> |
|--------------------------------------------|------------------------------|-------------------|
| β-actin                                    | abways                       | AB0035            |
| AURKB                                      | Abcam                        | ab2254            |
| CDC37                                      | Proteintech                  | 10218-1-AP        |
| p-S13 CDC37                                | HUABIO                       | ET1612-74         |
| E2F1                                       | Cell signaling<br>technology | #3742             |
| MYC                                        | Proteintech                  | 10828-1-AP        |
| p-T58 MYC                                  | ZENBIO                       | R381186           |
| N-cadherin                                 | Proteintech                  | 22018-1-AP        |
| MMP2                                       | Proteintech                  | 10373-2-AP        |
| PARP                                       | Proteintech                  | 13371-1-AP        |
| Caspase 7                                  | GeneTex                      | GTX123679         |
| Cyclin B1                                  | Proteintech                  | 55004-1-AP        |
| CDK1                                       | Proteintech                  | 19532-1-AP        |
| Flag                                       | Proteintech                  | 66008-4-Ig        |
| His                                        | Proteintech                  | 66005-1-Ig        |
| V5                                         | Proteintech                  | 14440-1-AP        |
| H3                                         | Proteintech                  | 17168-1-AP        |
| p-S10 H3                                   | Proteintech                  | 66863-1-Ig        |
| Bax                                        | Proteintech                  | 0599-2-Ig         |
| Bcl-2                                      | Proteintech                  | 12789-1-AP        |
| Cyclin D1                                  | Proteintech                  | 60186-1-Ig        |
| CDK4                                       | Proteintech                  | 11026-1-AP        |
| Rb                                         | SANTA CRUZ                   | sc-73598          |
| p-S780 Rb                                  | ZENBIO                       | R25557            |
| p-S807 Rb                                  | ZENBIO                       | R381059           |
| Rabbit IgG                                 | Proteintech                  | B900610           |
| Goat Anti-Rabbit IgG (H+L) HRP             | Abways                       | AB0101            |
| Goat Anti-Mouse IgG (H+L) HRP              | Abways                       | AB0102            |
| Rabbit Anti-Mouse IgG Kappa Light Chain    | Proteintech                  | SA00001-<br>19    |
| Mouse Anti-Rabbit IgG, Light Chain         | Proteintech                  | SA00001-<br>7L    |
| Goat Anti-Rabbit IgG (H+L) Alexa Fluor 594 | Abways                       | AB0518            |
| Goat Anti-Mouse IgG (H+L) Alexa Fluor 488  | Abways                       | AB0142            |
| Cycloheximide (CHX)                        | MCE                          | HY-12320          |
| MG132                                      | MCE                          | HY-13259          |
| AZD1152-HQPA                               | Selleck                      | S1147             |



2B

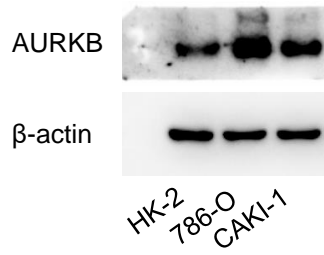

2I

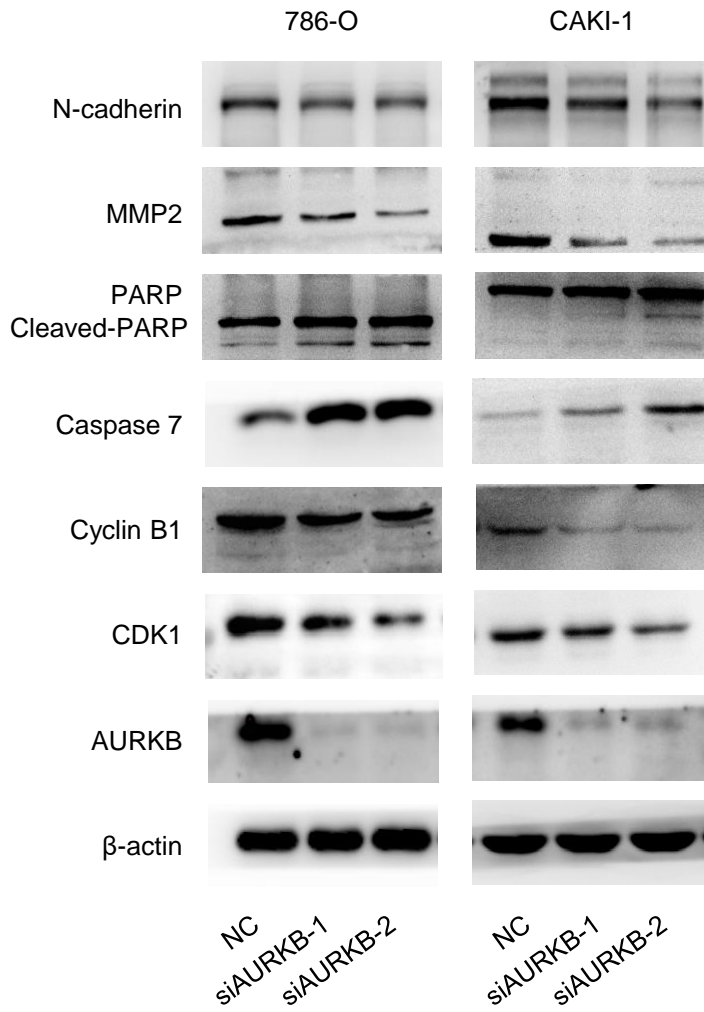

2M

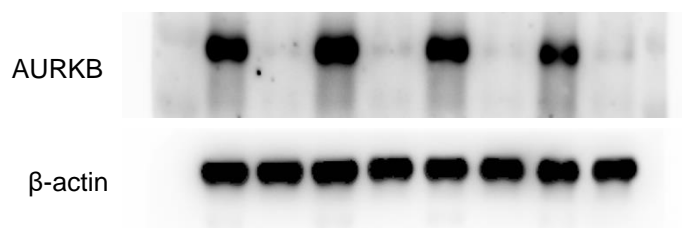

Original western blot of Fig 3

3B

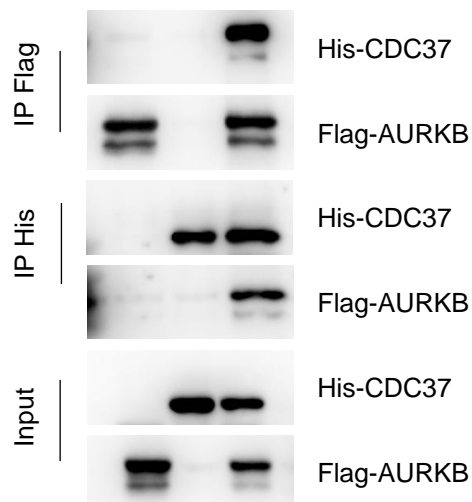

3D

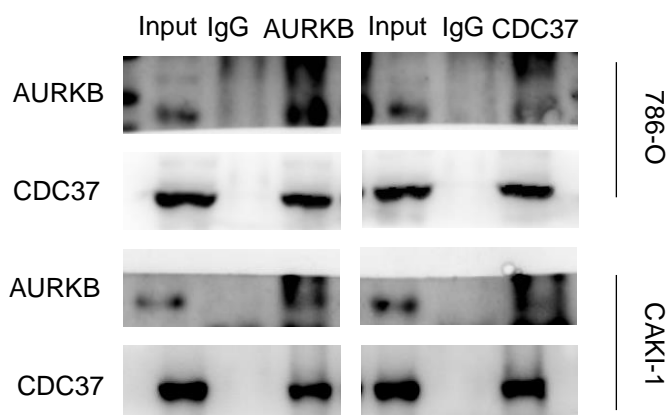

3E

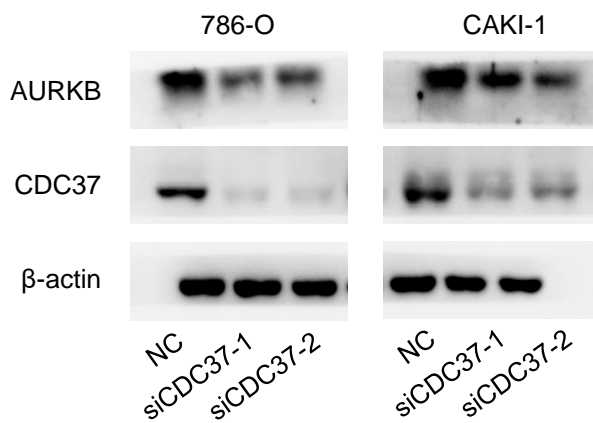

3F

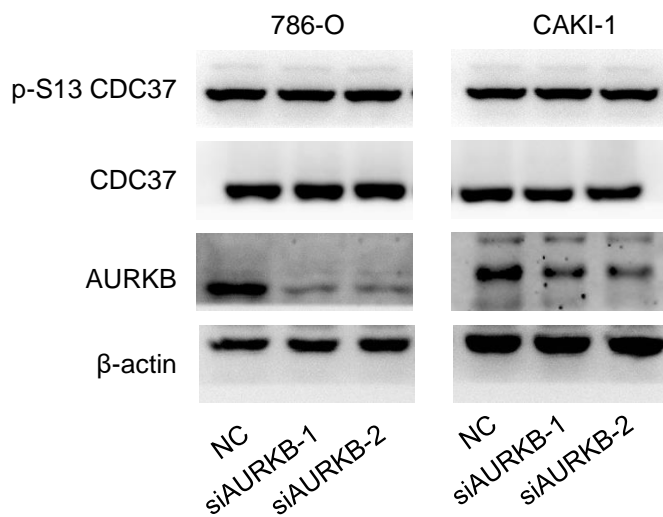

Original western blot of Fig 4

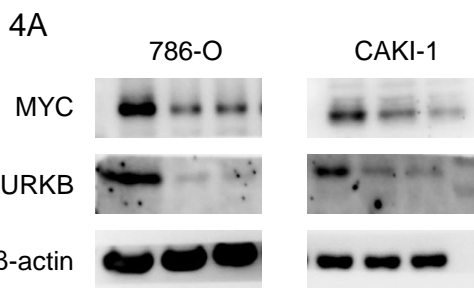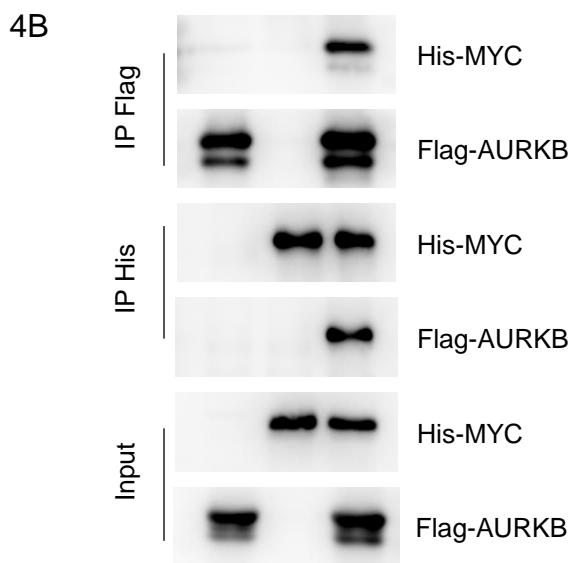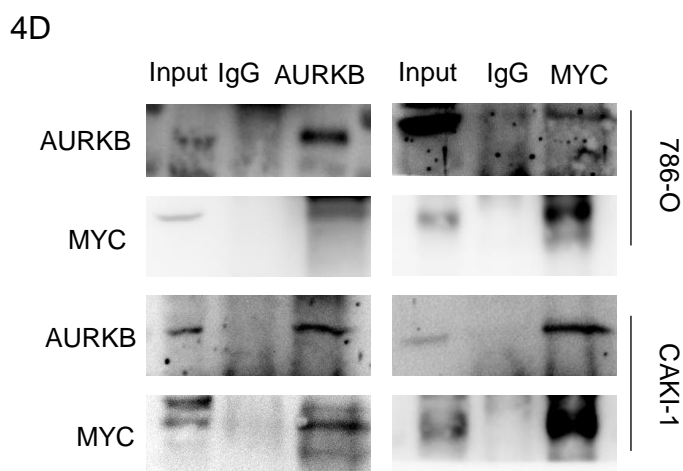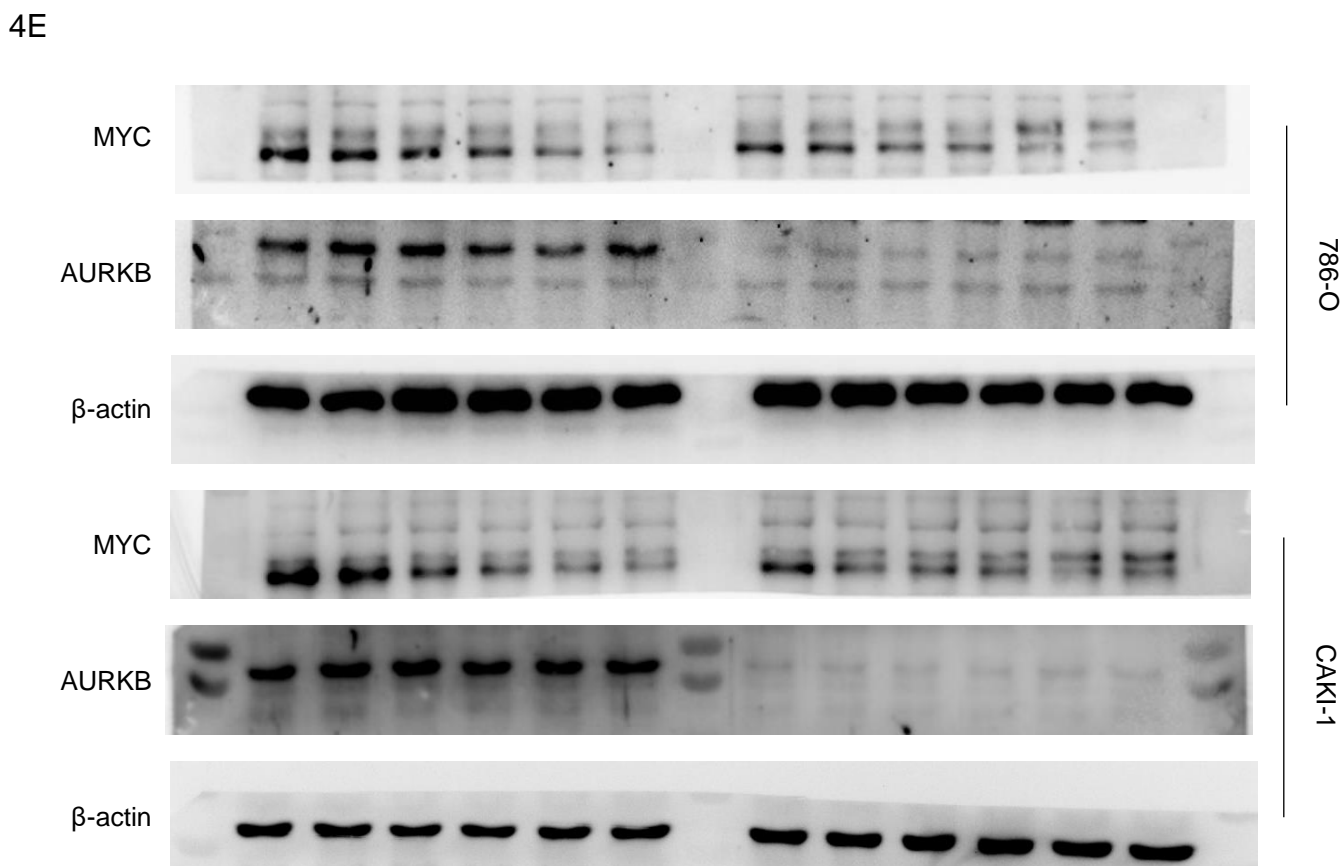

Original western blot of Fig 4

4F

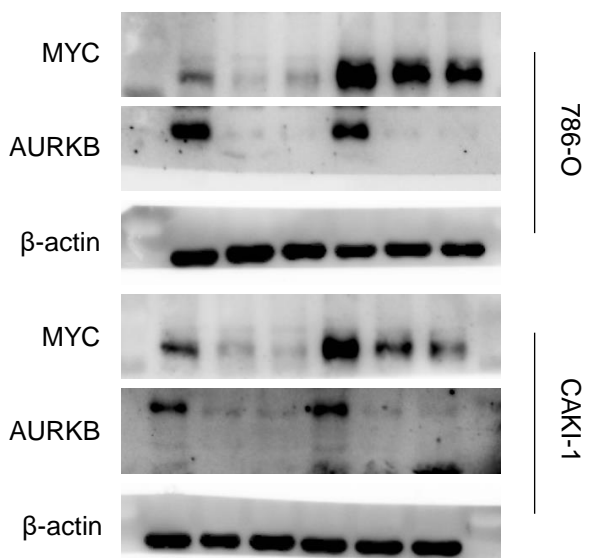

4G

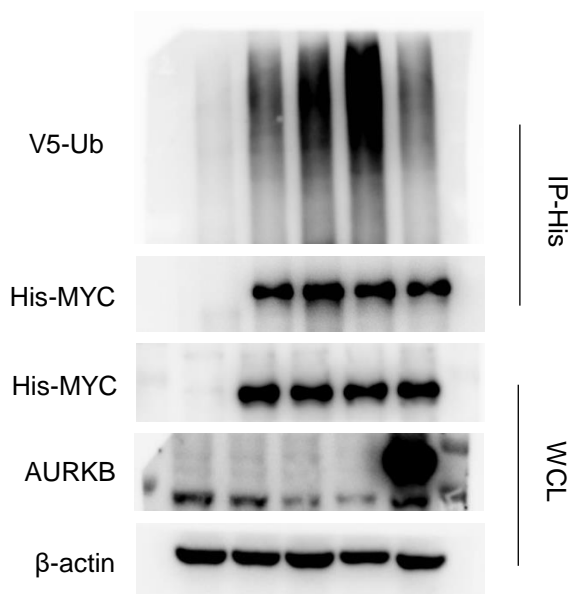

4H

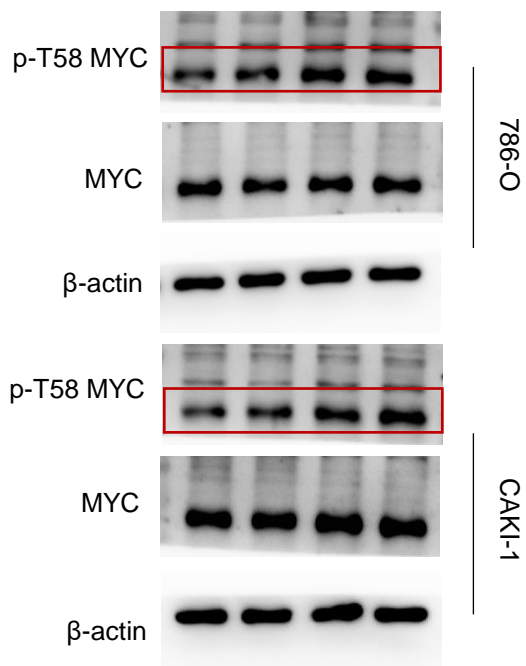

4I

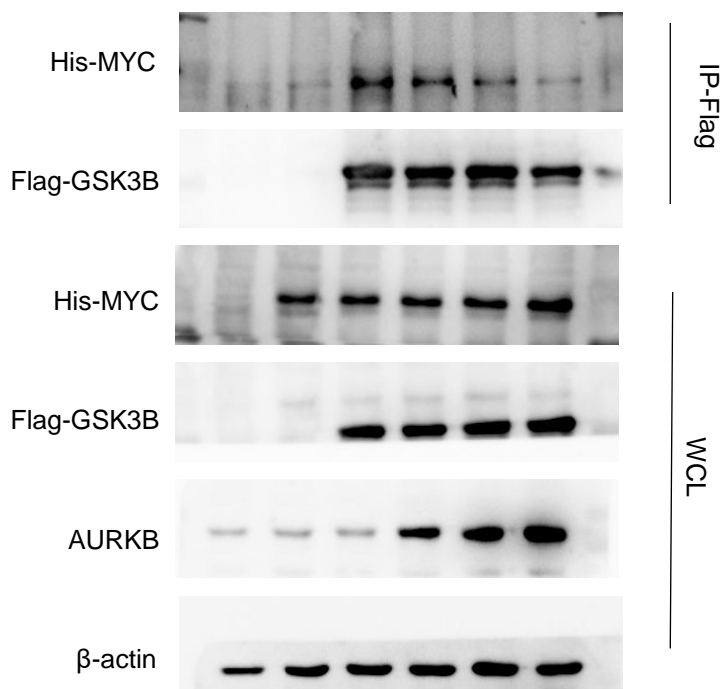

4J

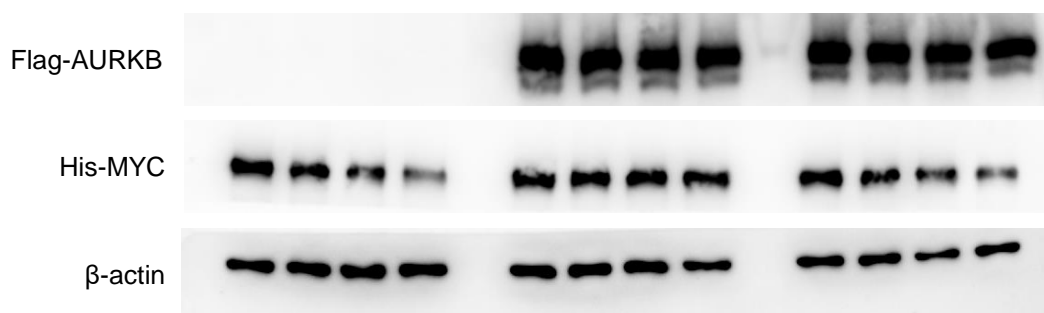

Original western blot of Fig 4

4L

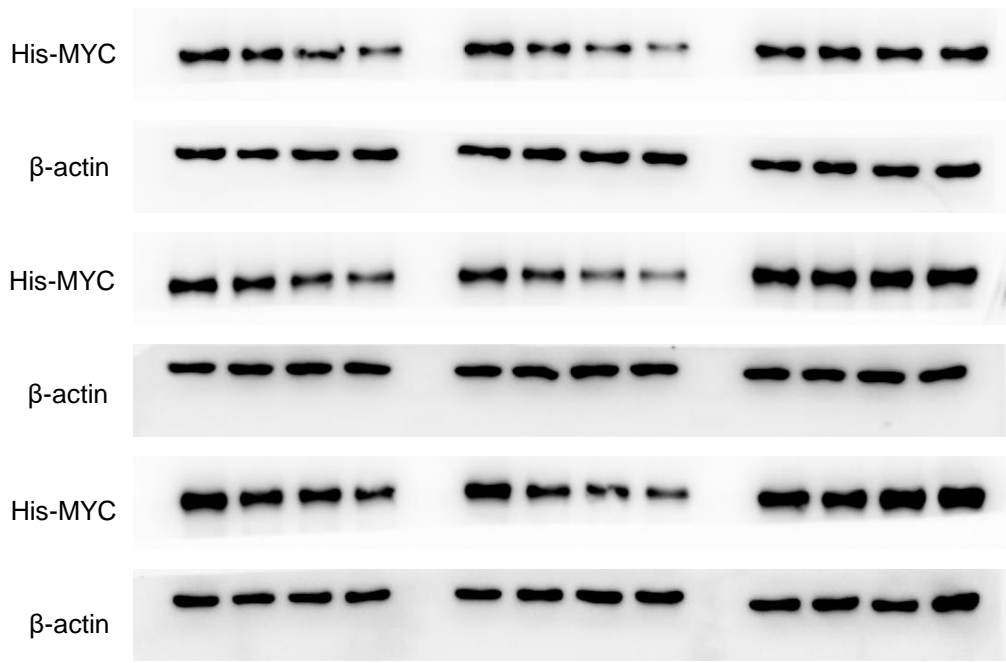

4M

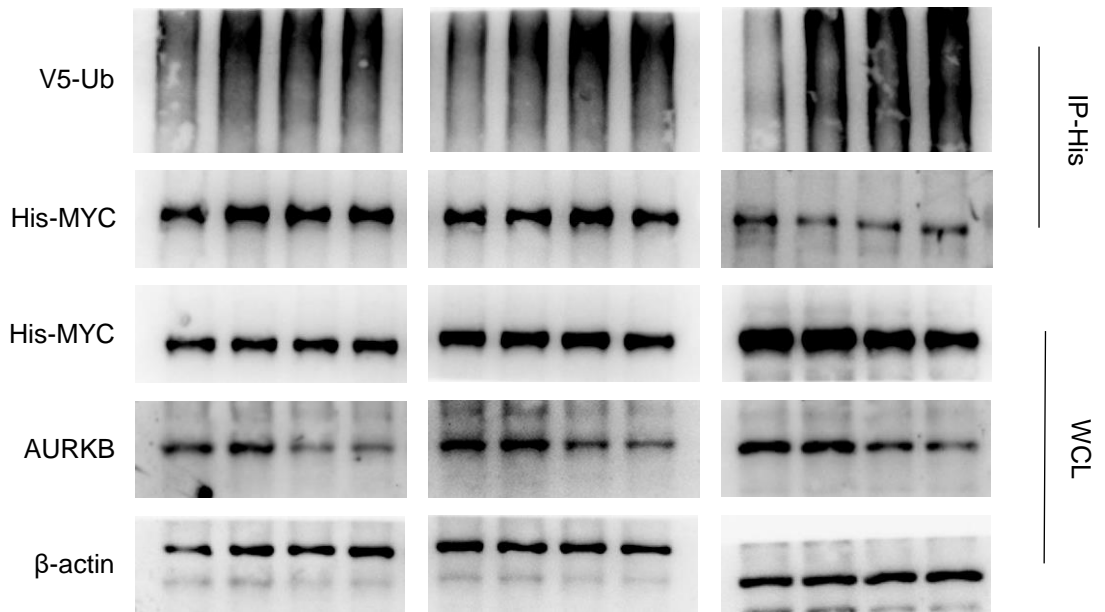

4N

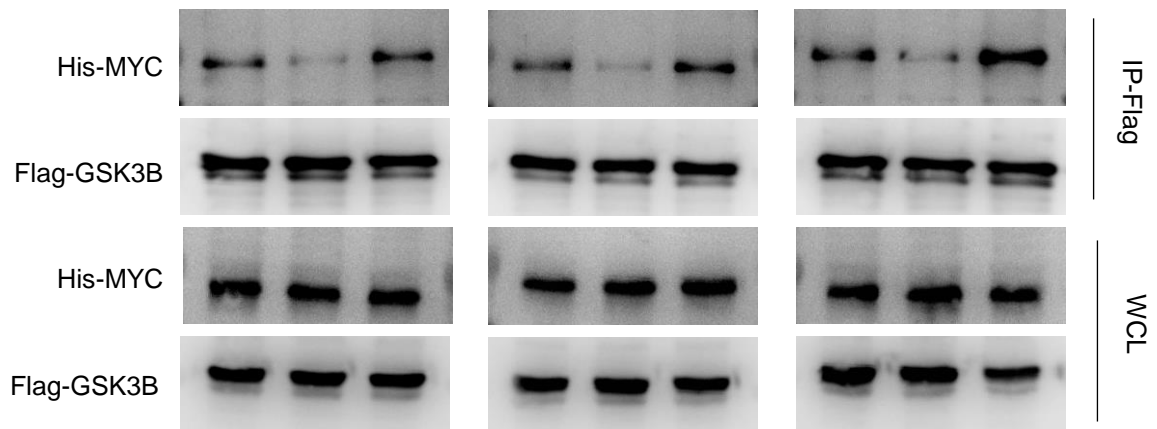

Original western blot of Fig 5

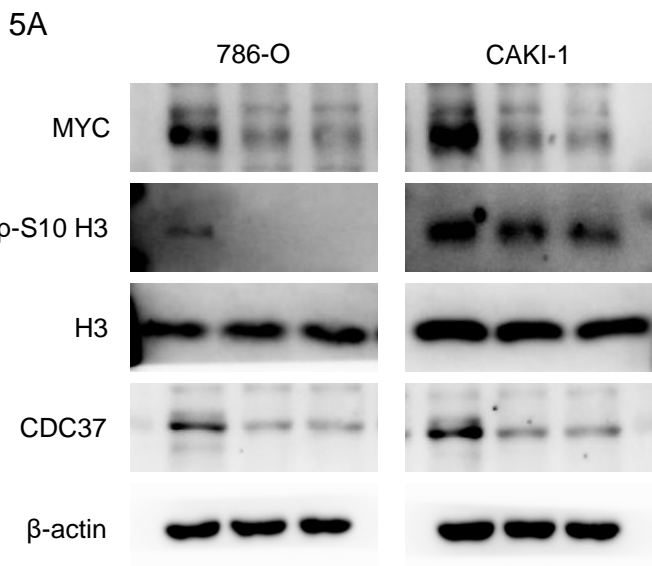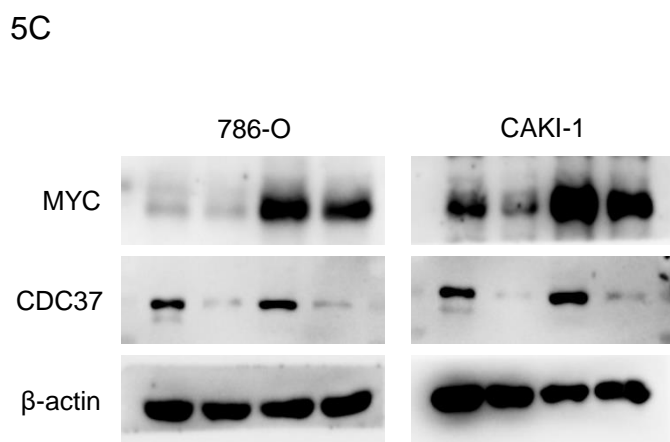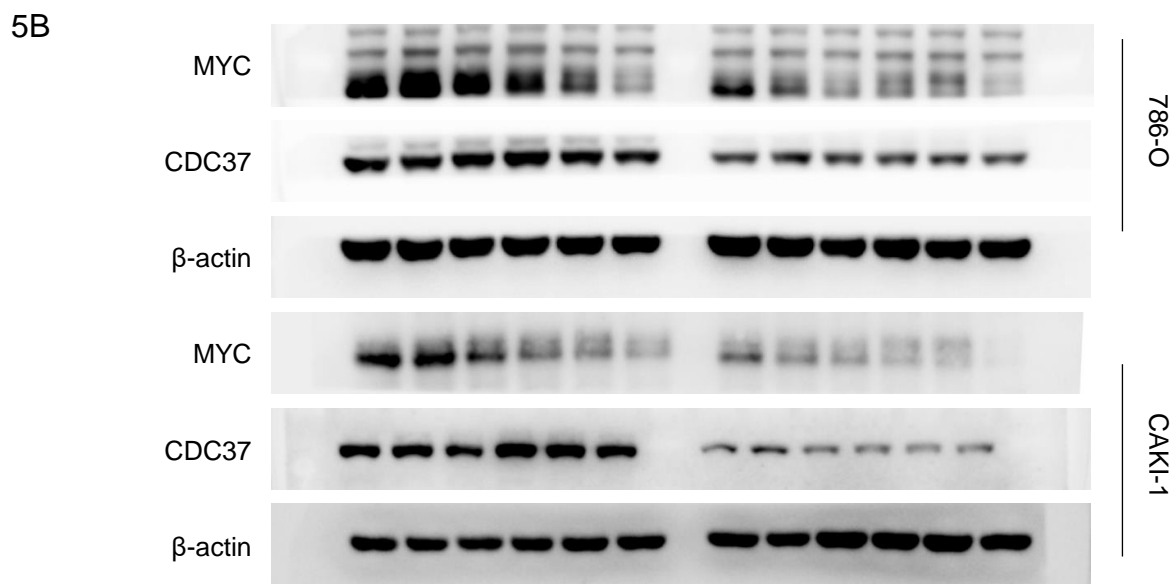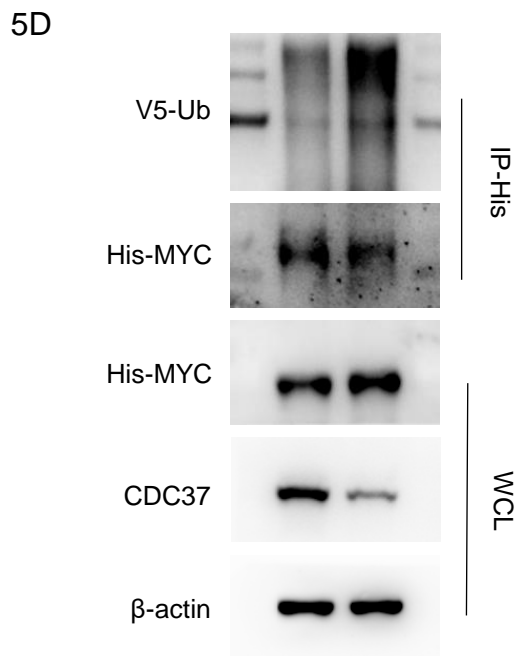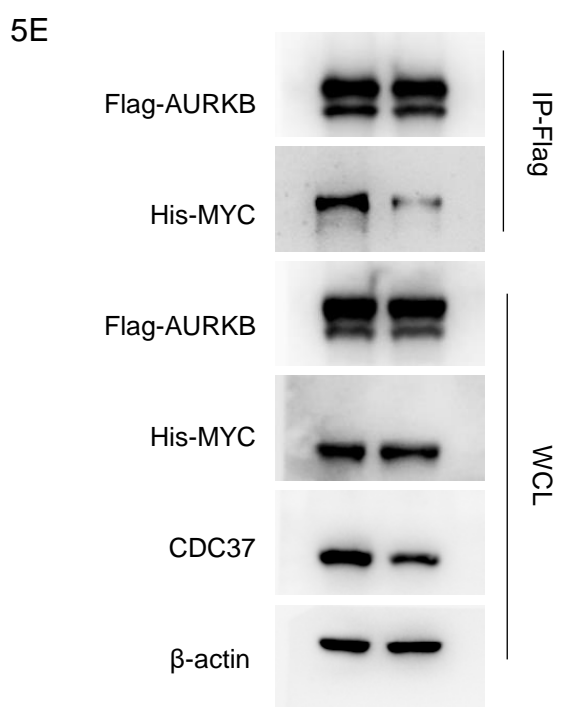

Original western blot of Fig 7

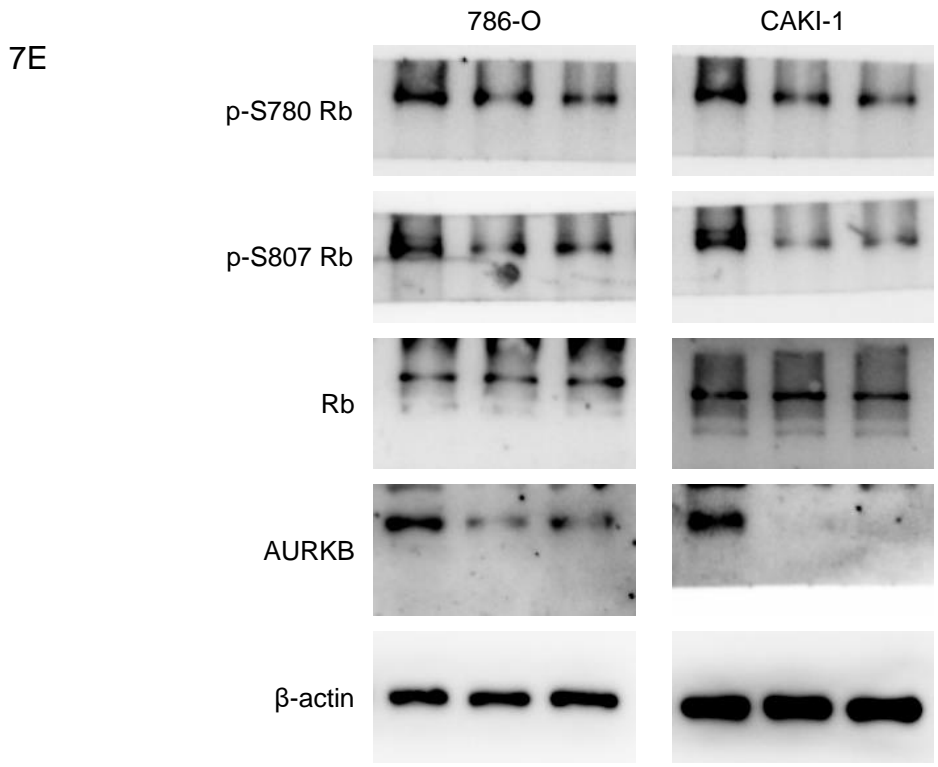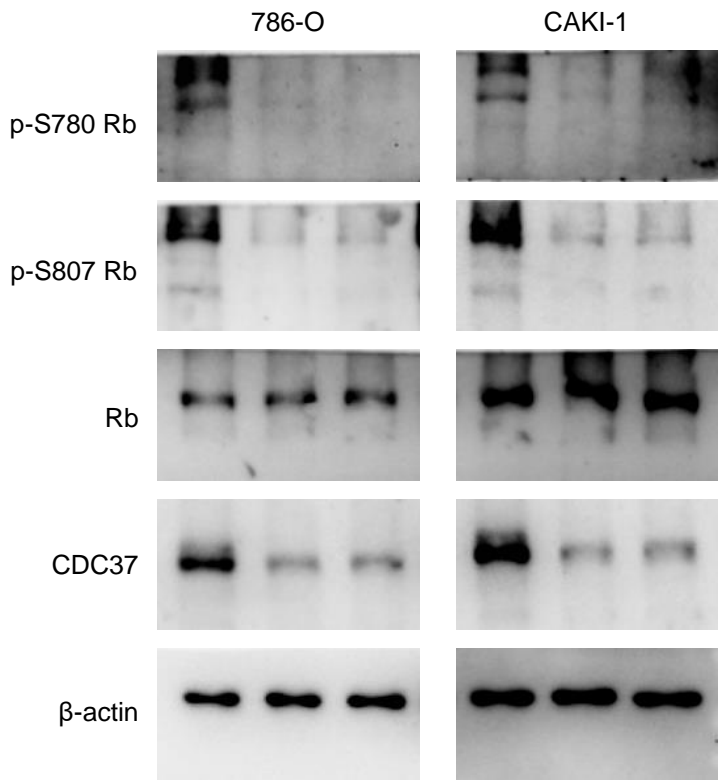

Original western blot of Fig S

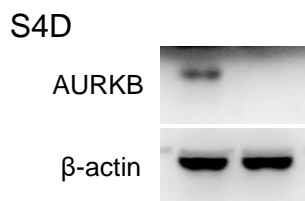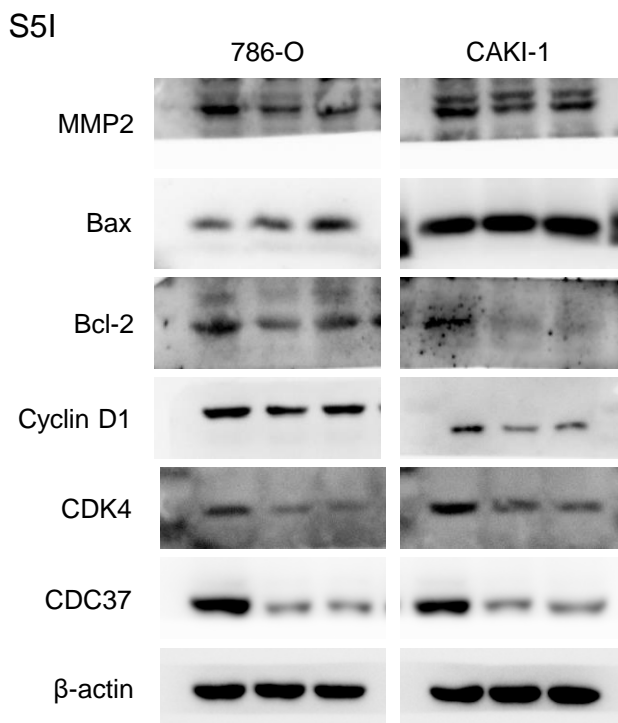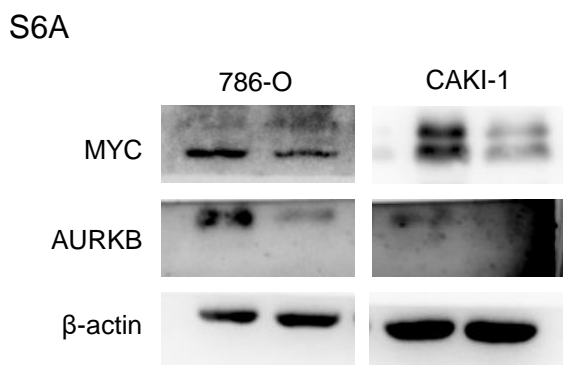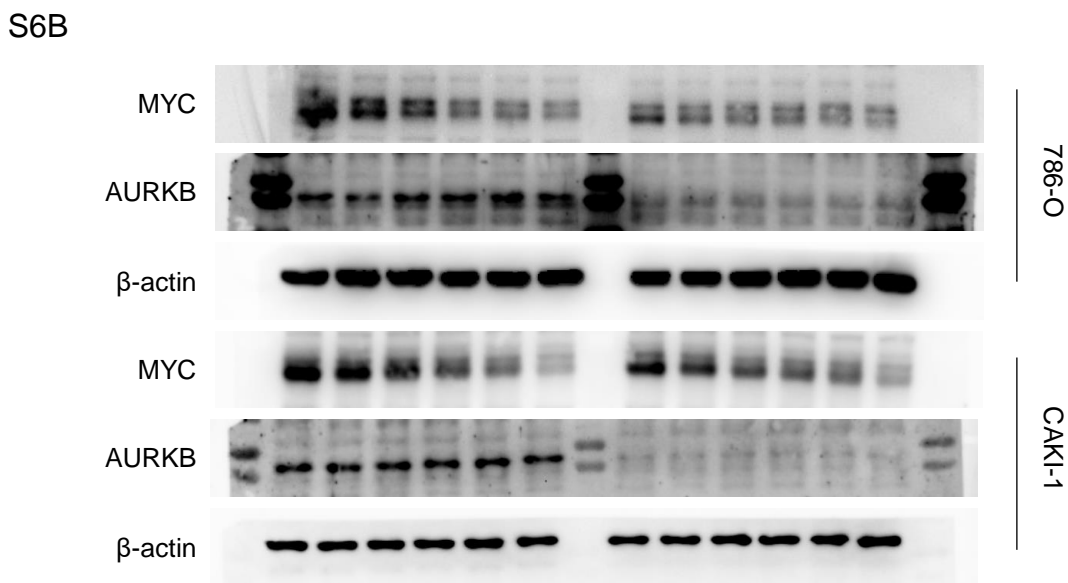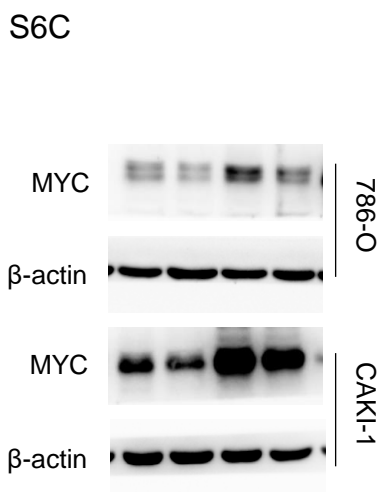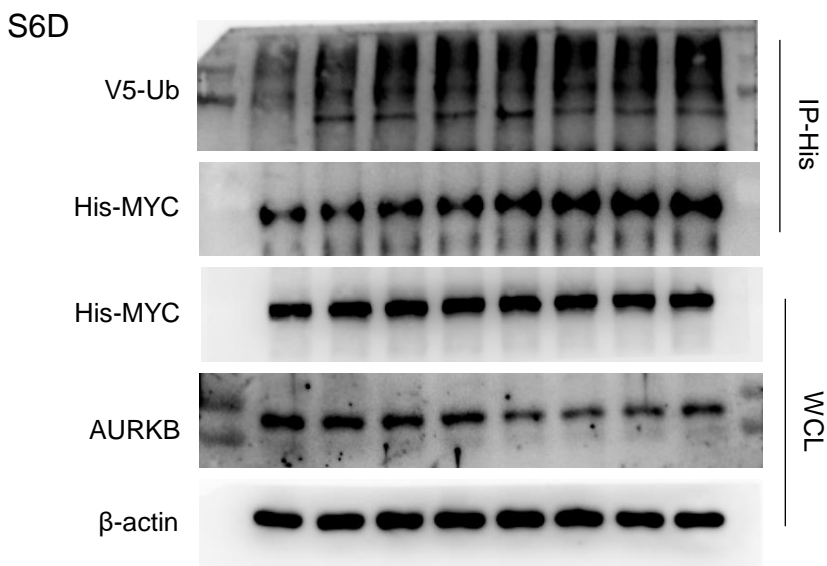



Original western blot of Fig S

S8A

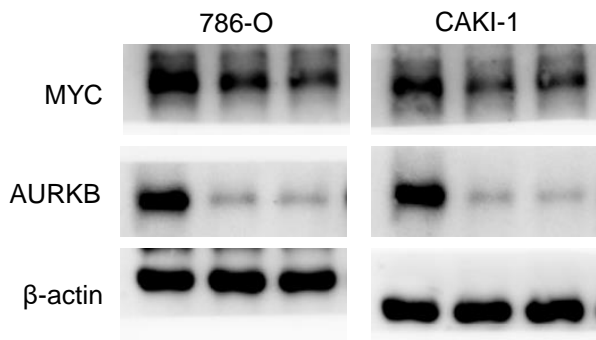

S8B

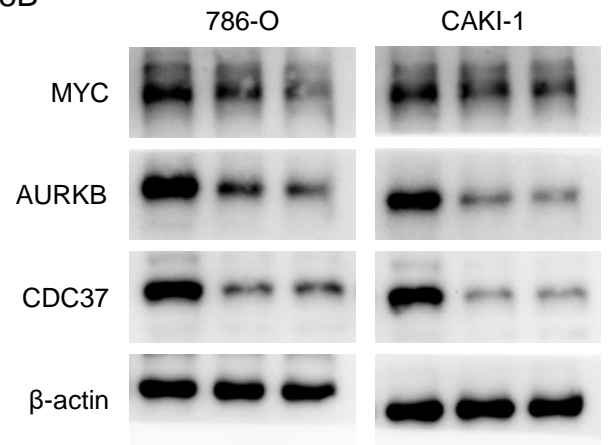

Supplement: 41419_2024_6827_MOESM1_ESM.pdf [file 41419_2024_6827_MOESM1_ESM.pdf]
